# Supplementary material for: Ion collision cross section analyses in quadrupole ion traps using the filter diagonalization method: a theoretical study
Source: Royal Society of Chemistry journal article supplement (doi:10.1039/c6cp00613b), 2016-01-01
Supplement: c6cp00613b1.pdf [file c6cp00613b1.pdf]

## **Ion Collision Cross Section Analyses in Quadrupole Ion Traps Using Filter**

### **Diagonalization Method: A Theoretical Study**

#### *Supplementary Information*

Ting Jiang,<sup>1</sup> Muyi He,<sup>1</sup> Dan Guo,<sup>1</sup> Yanbing Zhai<sup>1</sup> and Wei Xu<sup>1,2\*</sup>

<sup>1</sup>School of Life Science, Beijing Institute of Technology, Beijing 100081, China

<sup>2</sup>Key Laboratory of Convergence Medical Engineering System and Healthcare Technology, the Ministry of Industry and Information Technology, Beijing Institute of Technology, Beijing 100081, China

\*Corresponding Author:

Wei Xu

School of Life Science

Beijing Institute of Technology

Haidian, Beijing, 100081, China

Email: [weixu@bit.edu.cn](mailto:weixu@bit.edu.cn)

Phone: +86-010-68918123

### Generation of the theoretical ion trajectory in Figure 1:

The theoretical time-domain signal was generated as the following equation:

$$y = A \cos(\varphi)$$

where A is the amplitude of the time-domain signal described as

$$A = \frac{3 a_0 \pi}{3 \pi + 4 a_0 \delta_2 \omega_0 t}$$
$$\varphi = \frac{24 \pi \varphi_0 + 24 \pi \omega_0 t + 9 a_0^2 \pi \varepsilon_3 \omega_0 t + 32 a_0 \delta_2 \varphi_0 \omega_0 t + 32 a_0 \delta_2 \omega_0^2 t^2}{8 (3 \pi + 4 a_0 \delta_2 \omega_0 t)} ;$$

where  $a_0$  is the initial displacement of the ions ;angiotensin I ( $m/z = 432$ ) was used as model ions; Helium was used as the buffer gas (1mTorr);

$\delta_2 = \sigma_{hard - sphere} \frac{p}{T k M + m}$  is the hard-sphere damping coefficient.

$\sigma_{hard - sphere} = \pi r_0^2$  is the ion collision cross section, where  $r_0$  is the effective radius of the ion;  $\varphi_0$  is the initial phase ;  $\omega_0$  is the ion secular motion frequency.

### Space charge effects on ion motion frequency:

Space charge effects on ion motion frequency can be calculated using a method we developed earlier<sup>1</sup> and characterized by ion motion amplitudes ( $z$ ), ion numbers ( $N$ ), and  $q_x$  values. In the calculation, a group of ions was placed in the linear ion trap.<sup>1</sup> With the presence of  $10^3$  ions in the linear ion trap, Figure S1a plots the frequency shifts of the ion at different  $q_x$  values. Ion motion frequency shifts furthermore at lower  $q_x$  values with small ion motion amplitudes, and the frequency shifts are less than 6 Hz at  $q_x = 0.39$ . Denser ion clouds will induce stronger space charge effects. Figure S1b plots the frequency shifts of the ion with different number of ions. When the number of the ions reaches  $10^5$ , the frequency shifts will be close to

0.6 kHz. Such frequency shifts will influence the extraction of ion collision cross sections.

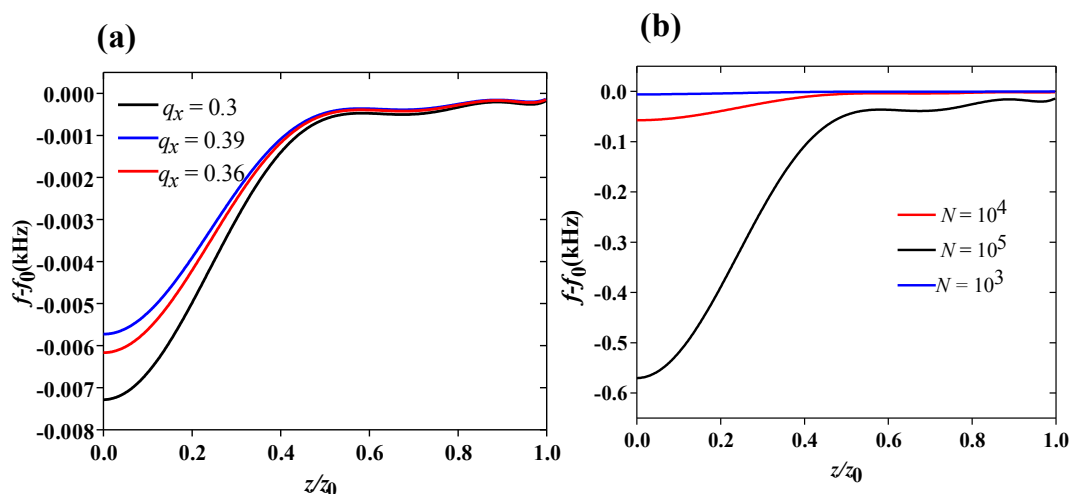

Figure S1 Space charge induced ion secular frequency shifts at different ion motion amplitudes. (a) Different  $q_x$  values with  $10^3$  ion number. (b) Different ion numbers at  $q_x = 0.39$ .  $T = 300$  K,  $r_0 = 5$  mm,  $q = 3 \times e$ ,  $m/z = 432$  Da, helium pressure 1 mTorr.

### Resolving ubiquitin isomer ions (+7) simultaneously:

Time-frequency curves in Figure 5a were obtained by simulating ubiquitin isomers individually. However, it is still possible to differentiate ubiquitin isomers when they were placed in the ion trap simultaneously. Although their trajectories add on top of each other, FDM could effectively identify two ion motion frequencies as their motion frequencies separate from each other due to their different ion-neutral collision rates ( $> \sim 100$  Hz). Figure S2 plots the time-frequency curves of ubiquitin isomer mixtures (+7, 1000 ions of each type), whose physical sizes are  $15.81 \text{ nm}^2$  and  $13.61 \text{ nm}^2$  respectively. Two ion CCSs,  $19.31 \text{ nm}^2$  and  $16.32 \text{ nm}^2$ , could then be

extracted after fitting these two curves. Results agree with those obtained by simulating each type of ions individually as shown in Figure 5a.

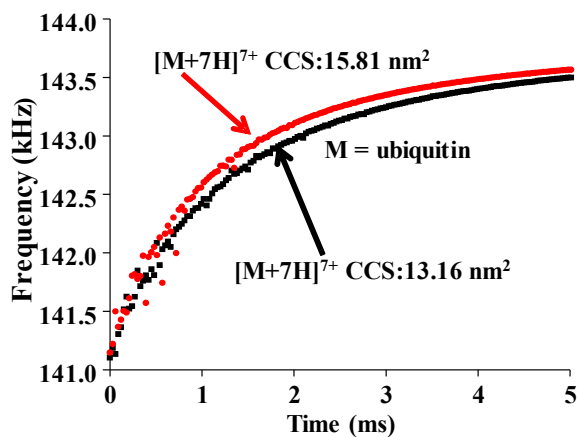

Figure S2 Simulated time-frequency curves of ubiquitin (+7) isomer ions, when these isomer ions were placed simultaneously in the ion trap.

### Ion CCS extraction and line fitting:

Eqn. (7) described in a previous work<sup>2</sup> was modified as follows,

$$f(t) = a \sqrt{1 + b \left( \frac{1}{(c + d a) e^{f t} - a d} \right)^2}$$

and used to fit the time-frequency profiles, where  $a, b, c, d, f$  are unknown parameters .

The calculated fitting parameters and  $R^2$  are shown in Table S1.

Table S1 Fitting parameters using the mixed ion-neutral collision model at pressure  $5 \times 10^{-4}$  and  $1 \times 10^{-3}$  Torr, respectively.

$5 \times 10^{-4}$  Torr

| A4    | a      | b     | c     | d        | f     | R <sup>2</sup> |
|-------|--------|-------|-------|----------|-------|----------------|
| -0.01 | 131300 | -3620 | 479   | 0.1725   | 7.917 | 0.9996         |
| -0.02 | 131300 | -5132 | 407.8 | 0.003267 | 32.1  | 0.9987         |
| -0.03 | 131300 | -6036 | 359.1 | 0.009908 | 80.45 | 0.9944         |

$1 \times 10^{-3}$  Torr

| A4    | a      | b     | c     | d       | f     | R <sup>2</sup> |
|-------|--------|-------|-------|---------|-------|----------------|
| -0.01 | 131300 | -3723 | 486.6 | 0.6238  | 4.523 | 0.9998         |
| -0.02 | 131300 | -5058 | 398.5 | 0.2831  | 8.245 | 0.9996         |
| -0.03 | 131300 | -6044 | 361.7 | 0.04015 | 47.42 | 0.9994         |
| -0.04 | 131300 | -6548 | 332.4 | 0.01499 | 102.5 | 0.9979         |
| -0.05 | 131200 | -7149 | 302.7 | 0.0155  | 109   | 0.9766         |

References

1. D. Guo, Y. Wang, X. Xiong, H. Zhang, X. Zhang, T. Yuan, X. Fang and W. Xu, *Journal of the American Society for Mass Spectrometry*, 2014, 25, 498-508.
2. M. He, D. Guo, Y. Chen, X. Xiong, X. Fang and W. Xu, *Analyst*, 2014, 139, 6144-6153.
